# Supplementary material for: A field-portable electrochemical immunosensor based on a multifunctional Ag2O/g-C3N4@MA-DBB covalent organic framework receptor interface for single-step detection of aflatoxin M1 in raw milk samples
Source: Royal Society of Chemistry journal article supplement (doi:10.1039/d4na00327f), 2024-01-01
Supplement: d4na00327f1.pdf [file d4na00327f1.pdf]

## Supporting Information

### A field portable electrochemical immunosensor based on multifunctional Ag<sub>2</sub>O/g-C<sub>3</sub>N<sub>4</sub>@MA-DBB covalent organic framework receptor interface for single-step detection of aflatoxin M<sub>1</sub> in raw milk samples

Iram Naz<sup>a,b</sup>, Akhtar Hayat<sup>\*b</sup>, Farhat Jubeen<sup>\*a</sup>, Sadia Asim<sup>a</sup>, Abida Kausar<sup>a</sup>,

- Department of Chemistry, Govt. College Women University, Arfa Kareem Road Faisalabad, 38000, Pakistan
- Interdisciplinary Research Center in Biomedical Materials (IRCBM), COMSATS University Islamabad, Lahore Campus, 1.5 Km Defense Road, off Raiwind Road, Lahore, Punjab, Pakistan 54000

\*Corresponding author: [akhtarhayat@cuilahore.edu.pk](mailto:akhtarhayat@cuilahore.edu.pk) ; [dr.farhatjubeen@gcwuf.edu.pk](mailto:dr.farhatjubeen@gcwuf.edu.pk)

**Table S1.** FT-IR spectra frequencies of g-C<sub>3</sub>N<sub>4</sub>, Ag<sub>2</sub>O/g-C<sub>3</sub>N<sub>4</sub>-COOH, MA-DBB-COF and Ag<sub>2</sub>O/g-C<sub>3</sub>N<sub>4</sub>-COOH@MA-DBB-COF

| Wavelength (cm <sup>-1</sup> ) | Assignment                    |
|--------------------------------|-------------------------------|
| 3729-3723                      | $\nu(\text{NH})$              |
| 2936-2912                      | $\delta\text{CH}_2$           |
| 1684-1620                      | $\nu(\text{Ar-C=N})$          |
| 1535-1506-1402-1392,1307,1226  | $\nu(\text{C-N})$ heterocycle |
| 1130-1024                      | $\nu(\text{C-N})$             |
| 770                            | $\omega(\text{C-N})$          |
| 804                            | Triazine Unit                 |

$\nu$ : stretching,  $\delta$ : bending,  $\omega$ : wagging

**Table S2.** Raman spectrum for D-band and G-band of g-C<sub>3</sub>N<sub>4</sub>, Ag<sub>2</sub>O/g-C<sub>3</sub>N<sub>4</sub>-COOH, MA-DBB-COF and Ag<sub>2</sub>O/g-C<sub>3</sub>N<sub>4</sub>-COOH@MA-DBB-COF

| <b>Material</b>                                                    | <b>D band wavenumber<br/>cm<sup>-1</sup></b> | <b>G band<br/>wavenumber<br/>cm<sup>-1</sup></b> | <b>I<sub>D</sub>/I<sub>G</sub></b> |
|--------------------------------------------------------------------|----------------------------------------------|--------------------------------------------------|------------------------------------|
| g-C <sub>3</sub> N <sub>4</sub>                                    | 800                                          | 1530                                             | 0.5                                |
| Ag <sub>2</sub> O/g-C <sub>3</sub> N <sub>4</sub>                  | 1470                                         | 1803                                             | 0.81                               |
| MA-DBB-COF                                                         | -                                            | 1705                                             | -                                  |
| Ag <sub>2</sub> O/g-C <sub>3</sub> N <sub>4</sub> -COOH@MA-DBB-COF | 1273                                         | 1617                                             | 0.78                               |

**Table S3.** Thermal degradation steps of g-C<sub>3</sub>N<sub>4</sub>, Ag<sub>2</sub>O/g-C<sub>3</sub>N<sub>4</sub>-COOH, MA-DBB-COF and Ag<sub>2</sub>O/g-C<sub>3</sub>N<sub>4</sub>-COOH@MA-DBB-COF with respect to changes in temperature

| <b>Material</b>                                                    | <b>Thermal degradation temperature range (°C), and % weight loss</b> |                 |                |                |                |
|--------------------------------------------------------------------|----------------------------------------------------------------------|-----------------|----------------|----------------|----------------|
|                                                                    | <b>I</b>                                                             | <b>II</b>       | <b>III</b>     | <b>IV</b>      | <b>V</b>       |
| g-C <sub>3</sub> N <sub>4</sub>                                    | 123-149<br>1                                                         | 559-681<br>87.7 | 681-800<br>0.1 | -              | -              |
| Ag <sub>2</sub> O/g-C <sub>3</sub> N <sub>4</sub> -COOH            | 48-98<br>2                                                           | 129-154<br>0.34 | 154-800<br>0   | -              | -              |
| MA-DBB-COF                                                         | 72-150<br>19                                                         | 150-393<br>51   | 390-450<br>4   | 507-561<br>2   | 555-800<br>0.1 |
| Ag <sub>2</sub> O/g-C <sub>3</sub> N <sub>4</sub> -COOH@MA-DBB-COF | 100-185<br>10                                                        | 223-454<br>11   | 506-692<br>7.3 | 692-800<br>0.1 | -              |

**Table S4.** Electro active surface area and peak potential difference of bare PGE and at different modification steps of PGE,

| <b>Electrodes</b>                                                                                                        | <b>Active Surface Area (cm<sup>2</sup>)</b> | <b><math>\Delta E_p</math></b> |
|--------------------------------------------------------------------------------------------------------------------------|---------------------------------------------|--------------------------------|
| *Bare                                                                                                                    | 0.024                                       | 0.46                           |
| EDC-NHS/Ag <sub>2</sub> O/g-C <sub>3</sub> N <sub>4</sub> +COF                                                           | 0.031                                       | 0.38                           |
| anti-AFM <sub>1</sub> antibody/EDC-NHS/Ag <sub>2</sub> O/<br>g-C <sub>3</sub> N <sub>4</sub> +COF                        | 0.021                                       | 0.31                           |
| BSA/anti-AFM <sub>1</sub> antibody/<br>EDC-NHS/Ag <sub>2</sub> O/g-C <sub>3</sub> N <sub>4</sub> +COF                    | 0.020                                       | 0.44                           |
| AFM <sub>1</sub> /BSA/ anti-AFM <sub>1</sub> antibody/<br>EDC-NHS/Ag <sub>2</sub> O/g-C <sub>3</sub> N <sub>4</sub> +COF | 0.018                                       | 0.16                           |

\*Geometric area of PGE is 0.052

**Table S5:** Analytical performance comparison of the BSA/anti-AFM<sub>1</sub> antibody/EDC-NHS/Ag<sub>2</sub>O/g-C<sub>3</sub>N<sub>4</sub>-COOH@MA-DBB-COF/PGE immunosensor with recently literature reported electrochemical sensors for detection of AFM<sub>1</sub>.

| Sr. no | Electrode                       | Materials                                                          | Linear range     | Detection limit | References       |
|--------|---------------------------------|--------------------------------------------------------------------|------------------|-----------------|------------------|
| 1      | Screen printed carbon electrode | Anti-idiotypic nanobodies                                          | 0.25-5 ng/mL     | 0.09 ng/mL      | <sup>1</sup>     |
| 2      | Screen printed carbon electrode | MoS <sub>2</sub> QD@UiO-66-NH <sub>2</sub> composite               | 0.2-10 ng/mL     | 0.06 ng/mL      | <sup>2</sup>     |
| 3      | Screen printed carbon electrode | PEG/Gold nanoparticles composite                                   | 0.02-0.3 ng/mL   | 0.007 ng/mL     | <sup>3</sup>     |
| 4      | Screen printed carbon electrode | GO-CS/CeO <sub>2</sub> -CS nanocomposite                           | 0.01-1 ng/mL     | 0.009 ng/mL     | <sup>4</sup>     |
| 5      | Dispense printed electrodes     | Single-walled carbon nanotubes (SWCNTs)                            | 0.01-1 ng/mL     | 0.02 ng/mL      | <sup>5</sup>     |
| 6      | Pencil graphite electrode       | rGO/Gold nanoparticles                                             | 0.0005-0.8 ng/mL | 0.0003 ng/mL    | <sup>6</sup>     |
| 7      | Glassy Carbon electrode         | Pt nanoparticles loaded on Fe-MOF                                  | 0.01-80 ng/mL    | 0.002 ng/mL     | <sup>7</sup>     |
| 8      | Glassy Carbon electrode         | Polyaniline                                                        | 0.005-0.09 ng/mL | 0.001 ng/mL     | <sup>8</sup>     |
| 9      | Pencil graphite electrode       | Ag <sub>2</sub> O/g-C <sub>3</sub> N <sub>4</sub> -COOH@MA-DBB-COF | 0.03-1000 fg/mL  | 0.01 fg/mL      | <b>This work</b> |

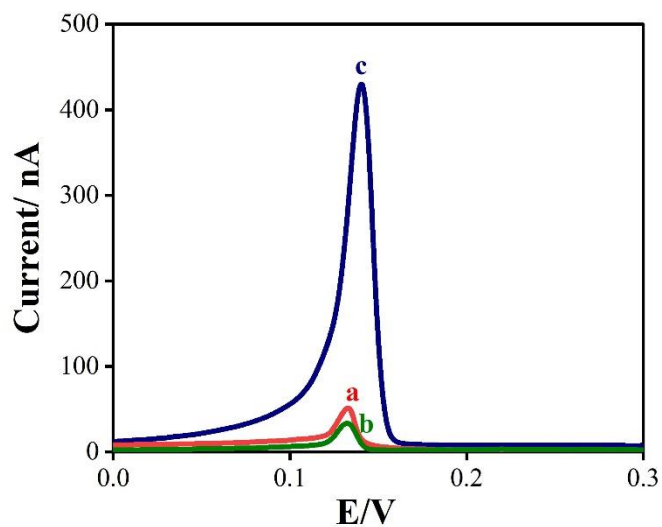

**Figure S1:** DPV at three steps of (a) pure  $\text{Ag}_2\text{O}/\text{g-C}_3\text{N}_4$ ; (b)  $\text{Ag}_2\text{O}/\text{g-C}_3\text{N}_4\text{-COOH}$ ; (c)  $\text{Ag}_2\text{O}/\text{g-C}_3\text{N}_4\text{-COOH}@MA\text{-DBB-COF}$ .

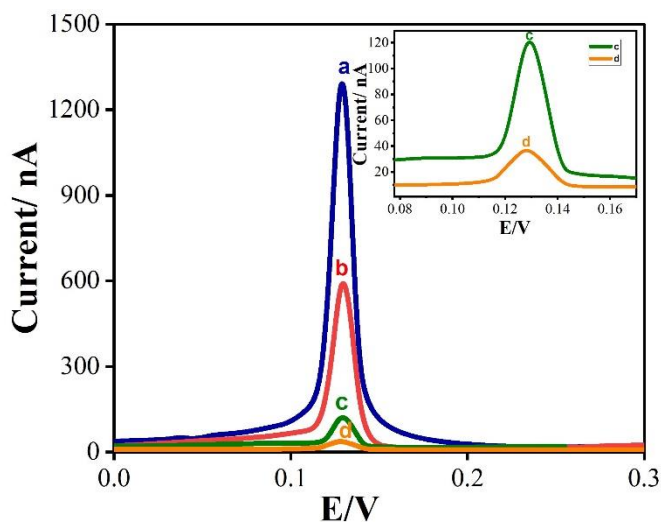

**Figure S2:** DPV at different steps of; a)  $\text{Ag}_2\text{O}/\text{g-C}_3\text{N}_4\text{-COOH}@MA\text{-DBB-COF}/\text{EDC-NHS}$  (b)  $\text{Ag}_2\text{O}/\text{g-C}_3\text{N}_4\text{-COOH}@MA\text{-DBB-COF}/\text{EDC-NHS}/$  anti- $\text{AFM}_1$  antibody (c)  $\text{Ag}_2\text{O}/\text{g-C}_3\text{N}_4\text{-COOH}@MA\text{-DBB-COF}+\text{EDC-NHS}/$  anti- $\text{AFM}_1$  antibody /BSA, and (d)  $\text{Ag}_2\text{O}/\text{g-C}_3\text{N}_4\text{-COOH}@MA\text{-DBB-COF}/\text{EDC-NHS}/$  anti- $\text{AFM}_1$  antibody /BSA/ $\text{AFM}_1$ .

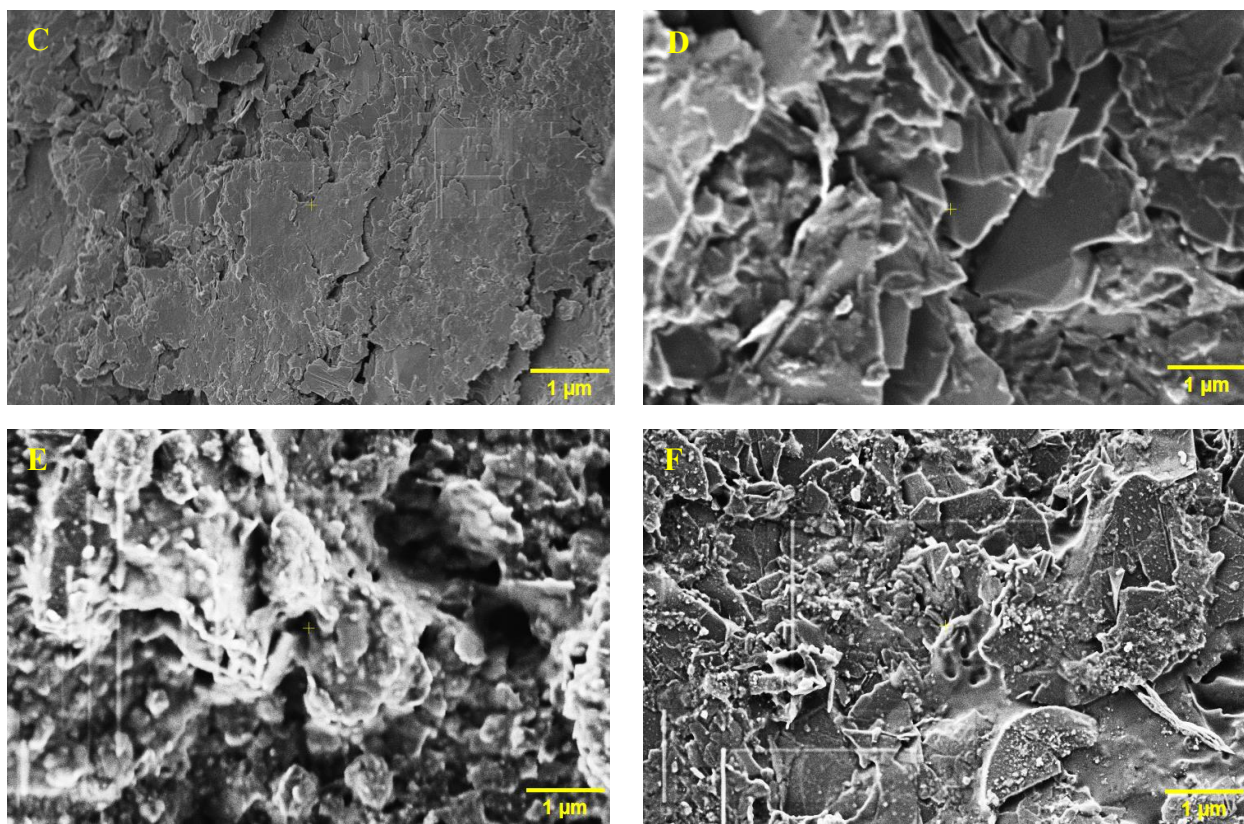

**Figure S3:** FE-SEM images of step wise modification of PGE for; (C) bare electrode, (D) EDC-NHS/Ag<sub>2</sub>O/g-C<sub>3</sub>N<sub>4</sub>-COOH@MA-DBB-COF/PGE, (E) anti-AFM<sub>1</sub>antibody/EDC-NHS/Ag<sub>2</sub>O/g-C<sub>3</sub>N<sub>4</sub>-COOH@MA-DBB-COF/PGE,(F)BSA/anti-AFM<sub>1</sub>antibody/EDC-NHS/Ag<sub>2</sub>O/g-C<sub>3</sub>N<sub>4</sub>-COOH@MA-DBB-COF/PG.

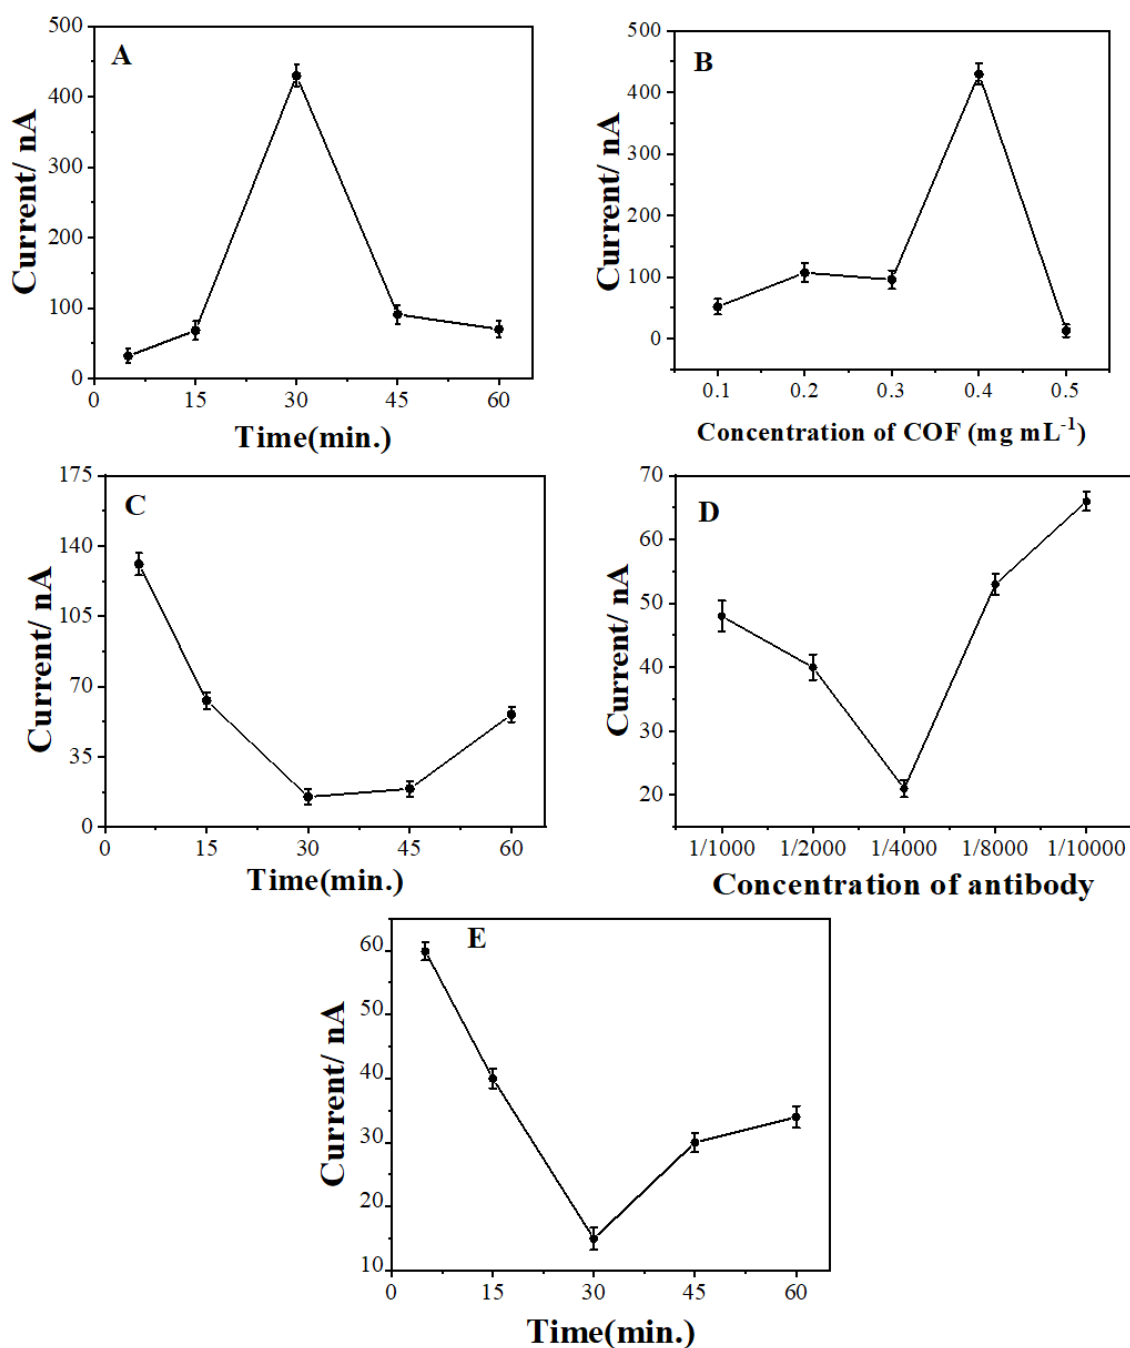

**Figure S4:** Optimization of the immunosensor: (A) different incubation time of Ag<sub>2</sub>O/g-C<sub>3</sub>N<sub>4</sub> for 5, 15, 30, 45 and 60min. ; (B) effect of MA-DBB-COF concentration with 0.1, 0.2, 0.3, 0.4 and 0.5 mg mL<sup>-1</sup>; (C) effect of reaction time of anti-AFM<sub>1</sub> antibody for 5, 15, 30, 45 and 60 min.; (D) effect of the concentration of anti-AFM<sub>1</sub> antibody with 1/1000, 1/2000, 1/4000, 1/8000 and 1/10,000 units of anti-AFM<sub>1</sub> antibody in PBS dilutions and (E) different incubation time of AFM<sub>1</sub> for 5, 15, 30 45 and 60 min.

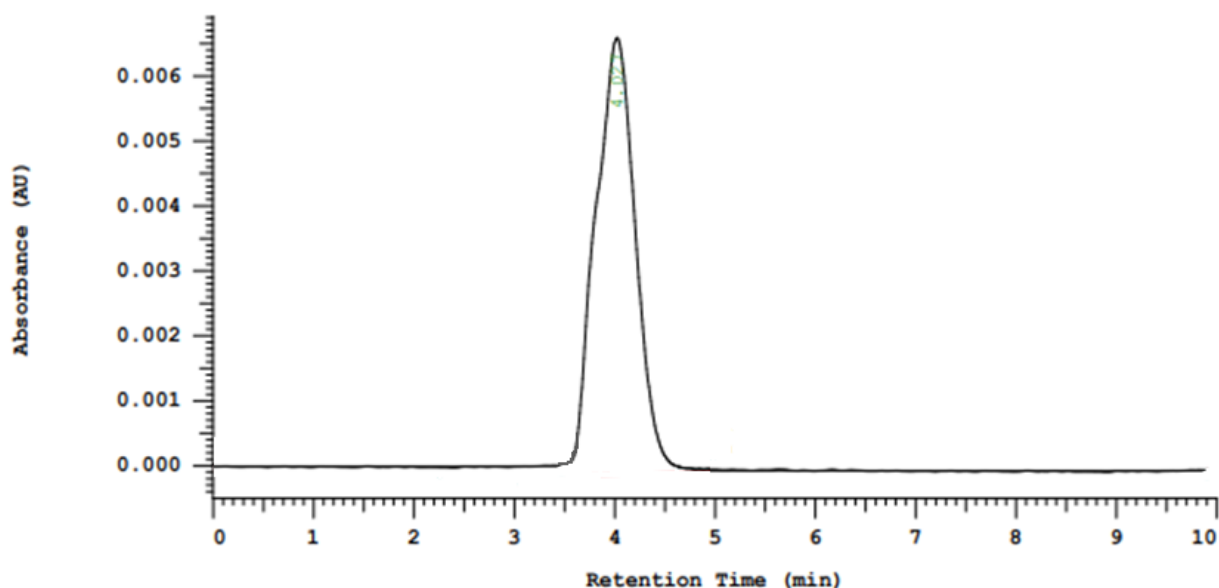

**Figure S5:** HPLC Chromatogram of standard AFM<sub>1</sub>.

## References

1. X. Tang, G. Catanante, X. Huang, J.-L. Marty, H. Wang, Q. Zhang and P. Li, *Food Chemistry*, 2022, **383**, 132598.
2. G. Kaur, S. Sharma, S. Singh, N. Bhardwaj and A. Deep, *ACS omega*, 2022, **7**, 17600-17608.
3. M. Hamami, A. Mars and N. Raouafi, *Microchemical Journal*, 2021, **165**, 106102.
4. X. An, X. Shi, H. Zhang, Y. Yao, G. Wang, Q. Yang, L. Xia and X. Sun, *New Journal of Chemistry*, 2020, **44**, 1362-1370.
5. B. D. Abera, A. Falco, P. Ibba, G. Cantarella, L. Petti and P. Lugli, *Sensors*, 2019, **19**, 3912.
6. S. F. Ahmadi, M. Hojjatoleslami, H. Kiani and H. Molavi, *Food chemistry*, 2022, **373**, 131321.
7. F. Jahangiri–Dehaghani, H. R. Zare and Z. Shekari, *Food Chemistry*, 2020, **310**, 125820.
8. T. Kulikova, A. Porfireva, G. Evtugyn and T. Hianik, *Electroanalysis*, 2019, **31**, 1913-1924.
